# Supplementary material
Source: publisher figshare collection journal article supplement (https://acs.figshare.com/ndownloader/files/4406740)
Supplement: Supplementary file 1 [file 4406740]

## Supporting Information

### Supercritical Fluid Synthesis of Magnetic Hexagonal Nanoplatelets of Magntite

Zhonglai Li<sup>a</sup>, Jeffrey F. Godsell<sup>b</sup>, Justin O'Bryne<sup>a</sup>, Nikolay Petkov<sup>c</sup>, Michael A. Morris<sup>a</sup>,  
Saibal Roy<sup>b</sup> and Justin D. Holmes<sup>a\*</sup>

#### Preparation of Fe<sub>3</sub>O<sub>4</sub> Nanoplatelets

A flow through system was established by connecting the inlet and outlet valves of a CO<sub>2</sub> reservoir, which included a piston, to a 260-ml ISCO syringe pump (Lincoln, NE) and the reaction vessel respectively. In a typical SCF experiment, a quartz boat containing 0.5 g of ferrocene was placed in the centre of a high pressure stainless steel reactor (Inconel 625 GR2-Snap-tite, Inc.). The reactor was then charged with sc-CO<sub>2</sub> (T<sub>c</sub> = 31 °C, P<sub>c</sub> = 7.38 MPa) at 40 °C and 10.34 MPa, and heated to a temperature between 650-750 °C under sc-CO<sub>2</sub>, with an outlet flow rate of 200 ml min<sup>-1</sup> for 2 h.

#### Characterization of Synthesized Materials

Transmission electron microscopy (TEM) was conducted on a JEOL 2010 operating at 200 kV. The TEM sample was prepared by placing drops of nanoparticle solution onto a carbon coated copper TEM grid. XRD measurements were performed on a Philips Xpert X-ray diffractometer using Cu K<sub>α</sub> radiation (1.5414 Å). XPS measurements were performed using a high performance AXIS 165 X-ray photoelectron spectrometer. The magnetic measurements were carried out on a Quantum Design, MPMS XL5, SQUID (Superconducting quantum interference device) magnetometer.

## Figures

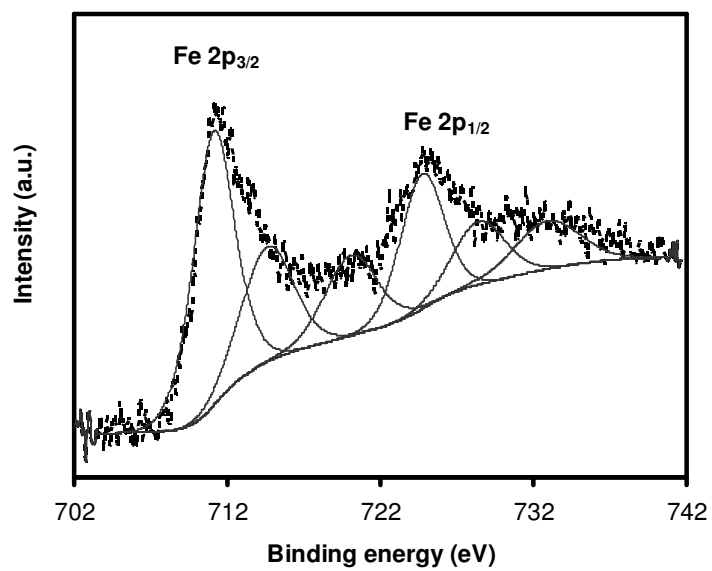

**Figure S1.** XPS spectrum of iron oxide ( $\text{Fe}_3\text{O}_4$ ) nanoplatelets prepared at 750 °C and 10.34 MPa.

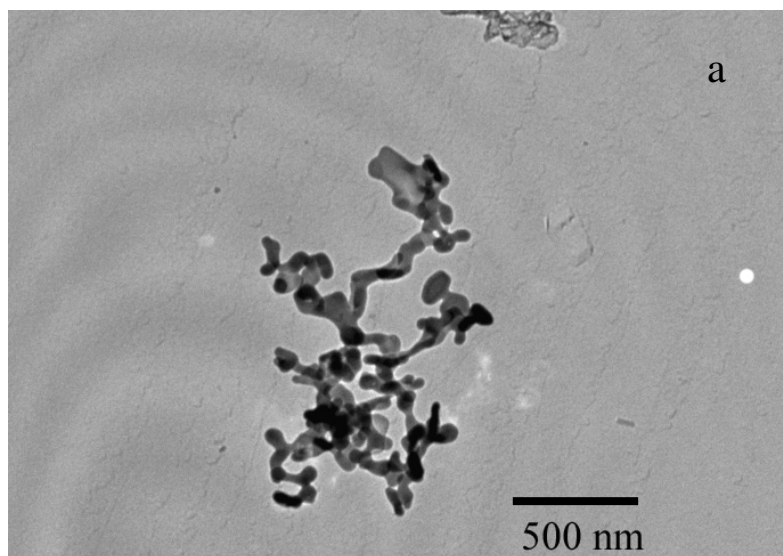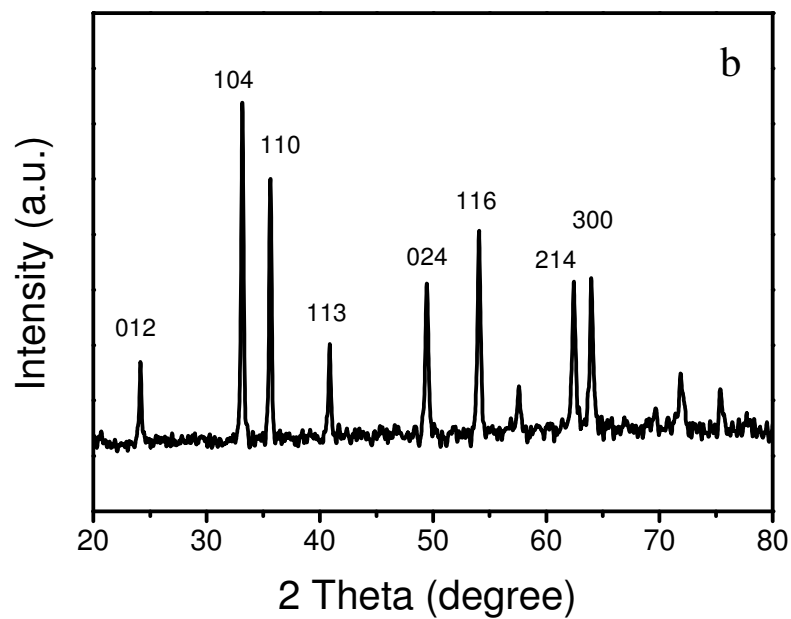

**Figure S2.** (a) TEM image and (b) XRD pattern (JCPDS, 01-1053) of  $\alpha$ -Fe<sub>2</sub>O<sub>3</sub> prepared by sintered  $\gamma$ -Fe<sub>2</sub>O<sub>3</sub> at 450 °C for 3 h in air.

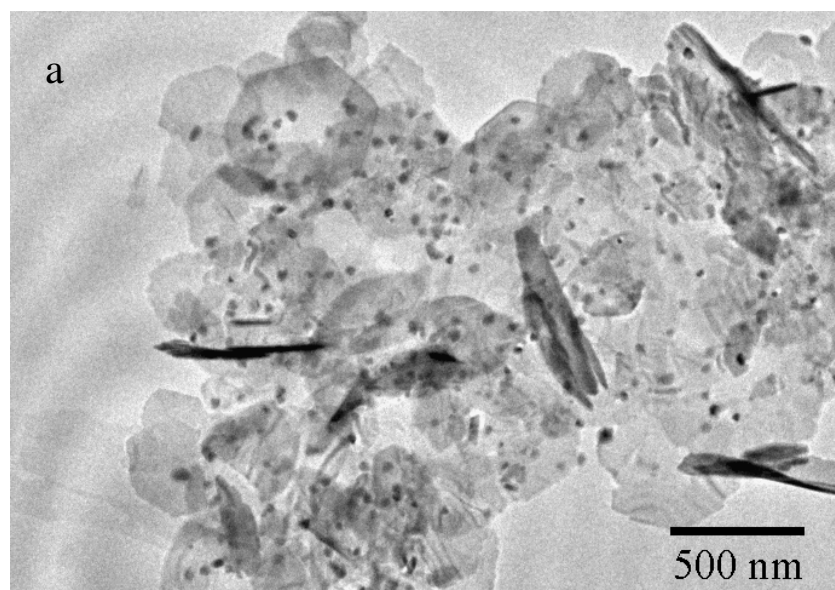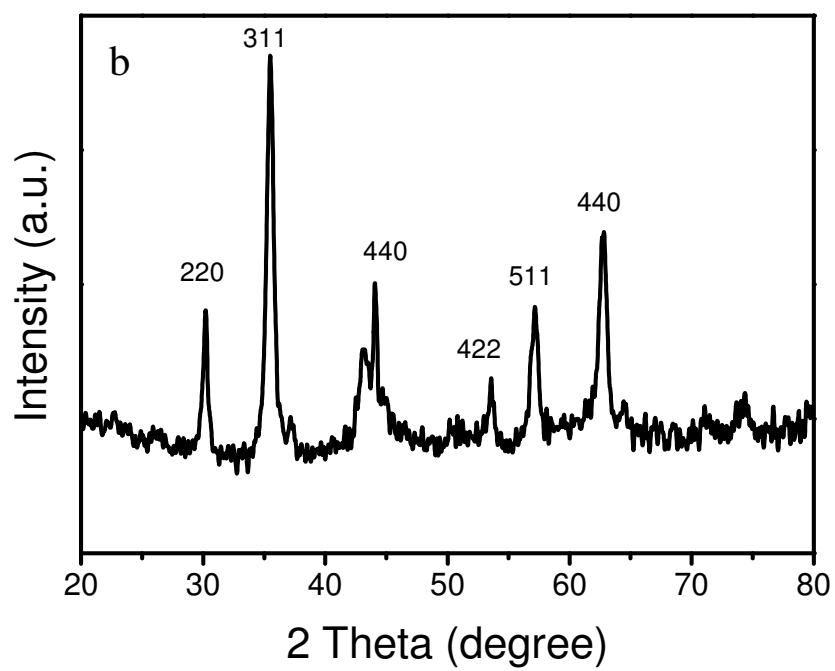

**Figure S3.** (a) TEM image and (b) XRD pattern of iron oxide ( $\text{Fe}_3\text{O}_4$ ) prepared at 650 °C and 10.34 MPa.

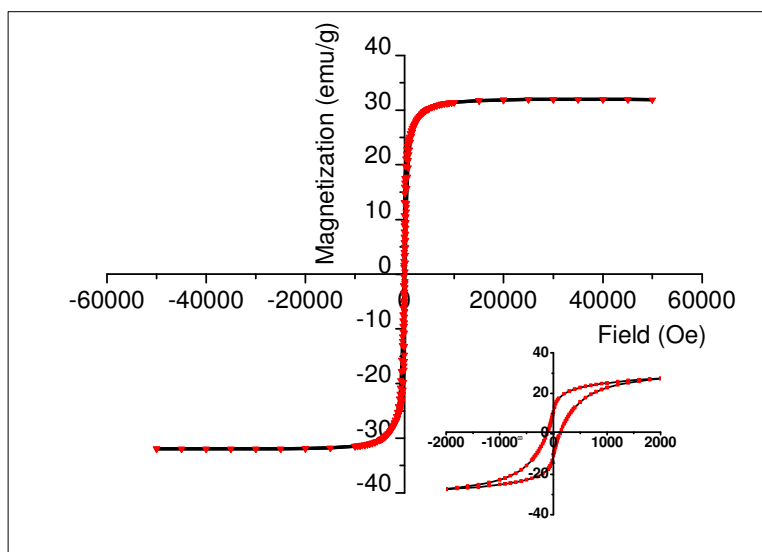

**Figure S4.** Magnetic hysteresis curve of iron oxide ( $\text{Fe}_3\text{O}_4$ ) nanoplatelets prepared at 650 °C and 10.34 MPa (inset showing the hysteresis loop zoomed in at the origin).
